# Supplementary material
Source: Springer Nature journal article supplement (https://www.springermedizin.de/resource/supplementary/13256_2011_2035_MOESM2_ESM.pdf/9648842)
Supplement: MOESM2 [file 9648842]

|                                                                                                      | <b>Pathogenesis known (+) / unknown (-)</b> | <b>Entity</b>                                                                                                                                                        | <b>Plasma exchange therapy +/-</b>                   |
|------------------------------------------------------------------------------------------------------|---------------------------------------------|----------------------------------------------------------------------------------------------------------------------------------------------------------------------|------------------------------------------------------|
| <b>Syndromes, defined as TTP-HUS</b>                                                                 | +                                           | postinfectious TTP-HUS (Shigatoxin-induced)                                                                                                                          | in some adults                                       |
|                                                                                                      | +                                           | ADAMTS-13 deficiency (hereditary, aquired)                                                                                                                           | +                                                    |
|                                                                                                      | +                                           | Deficiency in complement regulatory proteins (factors H and I, decay acceleration factor)                                                                            | +                                                    |
|                                                                                                      | -                                           | induced by chinine, mitomycin-C, ciclosporin, tacrolimus, TTP-HUS in other disorders / situations: HIV, SLE, intrapartal and postpartal, bone marrow transplantation | in some situations (HIV, SLE, intra- and postpartal) |
| <b>Syndromes with hemolytic anemia, thrombocytopenia, and schistocytosis, not defined as TTP-HUS</b> | (+)                                         | HELLP syndrome                                                                                                                                                       | -                                                    |
|                                                                                                      | +                                           | disseminated intravascular coagulopathy                                                                                                                              | -                                                    |
|                                                                                                      | +                                           | primary or secondary APS                                                                                                                                             | <i>in catastrophic APS</i>                           |
|                                                                                                      | +                                           | systemic sclerosis with renal crisis                                                                                                                                 | -                                                    |
|                                                                                                      | +                                           | malignant hypertension                                                                                                                                               | -                                                    |
| <b>Syndromes without microvascular hemolysis but with schistocytosis</b>                             | +                                           | megaloblastic anemia                                                                                                                                                 | -                                                    |
|                                                                                                      | +                                           | artificial heart valve replacement                                                                                                                                   | -                                                    |
|                                                                                                      | -                                           | hematopoietic stem cell transplantation                                                                                                                              | -                                                    |
| <b>Other causes of reduced ADAMTS-13 activity</b>                                                    | -                                           | metastasizing malignant tumors                                                                                                                                       | -                                                    |
|                                                                                                      | -                                           | sepsis                                                                                                                                                               | -                                                    |
|                                                                                                      | -                                           | connective tissue diseases                                                                                                                                           | -                                                    |
